# Supplementary material
Source: MDPI journal article supplement (https://www.mdpi.com/2073-4395/12/2/405)
Supplement: s1 [file s1]

# Supplementary Materials

## Poultry Litter Biochar as a Gentle Soil Amendment in Multi-Contaminated Soil: Quality Evaluation on Nutrient Preservation and Contaminant Immobilization

Chen-Chi Tsai\* and Yu-Fang Chang

Department of Forestry and Natural Resources, National Ilan University, Ilan 26047, Taiwan;  
yufang0115@gmail.com

\* Correspondence: cctsai@niu.edu.tw

### Results

#### *Thermal Analysis (TG/DTG) and IR Spectroscopy of PLBs*

Figure 1a shows the thermal degradation behavior (TG and differential TG (DTG)) of PLBs prepared at different temperature. The mass loss between 50 and 100 °C (150°C for P2) is due to the accumulated water in the sample. The major mass loss occurs for the sample P2 and P3 at 250–300 °C and 300–350 °C, for the sample P4 at 250–350 °C, sample P5 and P6 at 650–700 °C. Additional mass loss occurred in the wide range was due to the overlapping of degradation of different components. The final biochar residue yield of P2, P3, P4, P5, and P6 was 42.4%, 44.7%, 60.1%, 76.1%, and 86.3%, respectively. Thermal degradation profiles changed significantly at pyrolysis temperatures greater than 400°C. The degradation reactions occurred over a much broader temperature range between 400 and 700°C. Generally, the higher the pyrolysis temperature the higher the DTG peak temperature and the residual mass.

Figure 1b shows the strongest characteristic absorbance at the time point of 29.8 min corresponding to DTG peak  $T_{\max} = 325^{\circ}\text{C}$  for P2, 29.7 min corresponding to DTG peak  $T_{\max} = 324^{\circ}\text{C}$  for P3, 29.6 min corresponding to DTG peak  $T_{\max} = 323^{\circ}\text{C}$  for P4, 66.0 min corresponding to DTG peak  $T_{\max} = 688^{\circ}\text{C}$  for P5, 64.6 min corresponding to DTG peak  $T_{\max} = 674^{\circ}\text{C}$  for P6, respectively. The changes in the absorbance of volatiles during pyrolysis in Figure 1b agree with the weight loss in the DTG curve shown in Figure 1a. The first stage of pyrolysis occurs below 150°C), and the weight loss is very minimal in TG. The characteristic bands of  $\text{CO}_2$ ,  $\text{H}_2\text{O}$ ,  $\text{CH}_4$ , and  $\text{CO}$  gradually appear and increase between 150°C and 400°C. Meanwhile, the organic species of furans, phenols, ketones, and aldehydes are generated. The strongest spectral intensity of the above components emerges after 30 min, which corresponds to the maximum weight loss rate in the DTG curve. The last stage of pyrolysis occurs  $> 400^{\circ}\text{C}$ , and the absorbance gradually decreases. The releasing of gas products mainly focused at low temperatures (200–400°C).

### Discussion

#### *Thermal Analysis (TG/DTG) and IR Spectroscopy of PLBs*

The major mass loss could be due to the hemicelluloses and proteins presents in the fibers, because the degradation of hemicelluloses, cellulose and lignin starts between 140 to 356 °C, 306 to 386 °C and 226 to 606 °C (Chaula et al., 2014). The overlapping of degradation of cellulose and lignin, the two major components present in the fiber found in the PL, has resulted in the

additional mass loss in the wide range (Baniasadi et al., 2016), and it is the major decomposition step of PL (Basile et al., 2014; Heikkinen et al., 2004). Further, the mass loss beyond 650 °C was contributed by the degradation of  $\text{CaCO}_3$  (Blamey et al., 2010). As reported by the (Giuntoli et al., 2009) calcium carbonate was used as a food additive in order to strengthen the chicken egg shells. Mimmo et al. (2014) suggested that biochars obtained at temperatures above 360°C show broader thermal degradation reactions ending at 600°C due to a series of complex chain reactions characteristic of lignin and lignin-like structures as was confirmed by the O/C ratio around 0.7, which is characteristic of non-condensed aromatic structures (Hammes et al., 2006). Thermal analysis has confirmed that pyrolysis temperature affects the biochar structure influencing its recalcitrant characteristics (Mimmo et al., 2014).

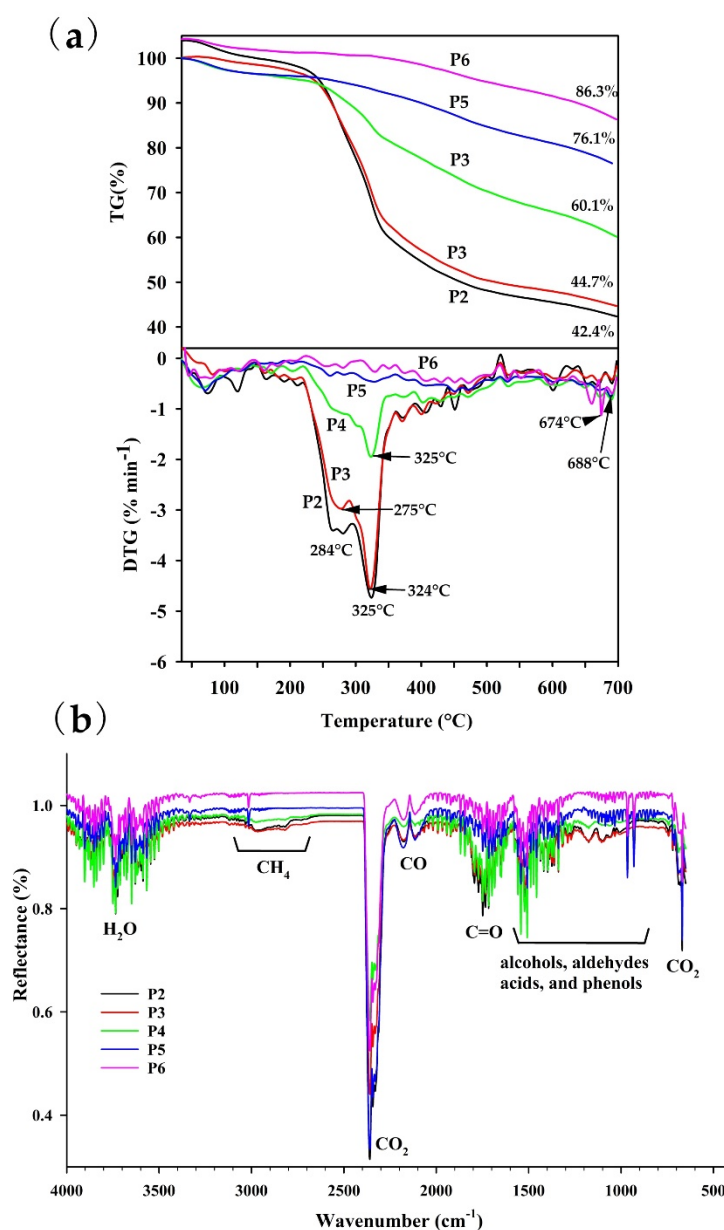

**Figure S1.** (a) Thermo gravimetric analysis of the five PLBs biochar produces from different temperature at constant heating rate (10°C min<sup>-1</sup>) with N<sub>2</sub> gas at 20 mL min<sup>-1</sup>. (b) IR spectrum for six PLBs corresponding to DTG peak (P2, T<sub>max</sub> = 325°C; P3, T<sub>max</sub> = 324°C; P4, T<sub>max</sub> = 323°C; P5, T<sub>max</sub> = 688°C; P6, T<sub>max</sub> = 674°C) (P2, P3, P4, P5, P6 = poultry litter pyrolyzed at 200, 300, 400, 500, and 600 °C)

The specific wave numbers of the IR peak of the main gas species from biomass pyrolysis are listed as the following: CO<sub>2</sub>: 2363 cm<sup>-1</sup>, CO: 2167 cm<sup>-1</sup>, CH<sub>4</sub>: 3017 cm<sup>-1</sup>, carbohydrate contained organic functional groups of C=O: 1730 cm<sup>-1</sup>, carbohydrate contained organic functional groups C–O–C/C–C: 1167 cm<sup>-1</sup> (Bassilakis et al., 2001; Yan et al., 2005; Yang et al., 2007). The bands between 4000 and 3400 cm<sup>-1</sup> represent O–H bond stretching vibrations, related to H<sub>2</sub>O, which came primarily from the evaporation and dehydration of the sample. The formation of CH<sub>4</sub>, corresponding to the stretching vibration of C–H bonds at (3050–2650 cm<sup>-1</sup>), can be caused by the cracking of the methoxyl (–O–CH<sub>3</sub>), methyl (–CH<sub>3</sub>), and methylene (–CH<sub>2</sub>–) groups at < 500°C (Fu et al., 2011). The rupture of aromatic rings was observed at 500°C. The obvious characteristic absorbance at 2400–2240 cm<sup>-1</sup> is representative of CO<sub>2</sub>, which is mainly caused by the cracking and reforming of the functional groups of carboxyl (C=O) and carbonyl (C–O–C) (Fu et al., 2010). The characteristic band of CO (2230–2000 cm<sup>-1</sup>) is very close to that of CO<sub>2</sub>. The release of CO can be attributed to the breakage of ether bonds and C=O bonds; the secondary decomposition of the volatiles and char residues at >600°C can also form CO (Granada et al., 2012). The most obvious characteristic absorbance is C=O stretching absorbance (1880–1620 cm<sup>-1</sup>), which indicates the presence of aldehydes, ketones, and organic acids (Gao et al., 2013). The bands at 1600–400 cm<sup>-1</sup> are much complex, and identifying each component is difficult. Previous studies showed that these bands indicate the presence of some organics, including alcohols, aldehydes, acids, and phenols (Fasina and Littlefield, 2012; Fu et al., 2012; Granada et al., 2012).

## References

- Baniasadi, M.; Tugnoli, A.; Conti, R.; Torri, C.; Fabbri, D.; Cozzani, V. Waste to energy valorization of poultry litter by slow pyrolysis. *Renew. Energy* **2016**, *90*, 458–468, <https://doi.org/10.1016/j.renene.2016.01.018>.
- Basile, L.; Tugnoli, A.; Stramigioli, C.; Cozzani, V. Influence of pressure on the heat of biomass pyrolysis. *Fuel* **2014**, *137*, 277–284, <https://doi.org/10.1016/j.fuel.2014.07.071>.
- Bassilakis, R.; Carangelo, R.M.; Wojtowicz, M.A. TG-FTIR analysis of biomass pyrolysis. *Fuel* **2001**, *80*, 1765–1786, [https://doi.org/10.1016/S0016-2361\(01\)00061-8](https://doi.org/10.1016/S0016-2361(01)00061-8).
- Blamey, J.; Anthony, E.J.; Wang, J.; Fennell, P.S. The calcium looping cycle for largescale CO<sub>2</sub> capture. *Prog. Energy Combust. Sci.* **2010**, *36*, 260–279, <https://doi.org/10.1016/j.pecs.2009.10.001>.
- Chaula, Z.; Said, M.; John, G. Thermal characterization of pine sawdust as energy source feedstock. *Journal of Energy Technologies and Policy* **2014**, *4*, 57–65.
- Fasina, O.; Littlefield, B. TG-FTIR analysis of pecan shells thermal decomposition. *Fuel Process Technol.* **2012**, *102*, 61–66, <https://doi.org/10.1016/j.fuproc.2012.04.015>.
- Fu, P.; Hu, S.; Xiang, J.; Li, P.; Huang, D.; Jiang, L.; Zhang, A.; Zhang, J. FTIR study of pyrolysis products evolving from typical agricultural residues. *J. Anal. Appl. Pyrol.* **2010**, *88*, 117–23, <https://doi.org/10.1016/j.jaap.2010.03.004>.
- Fu, P.; Hu, S.; Xiang, J.; Sun, L.; Su, S.; An, S. Study on the gas evolution and char structural change during pyrolysis of cotton stalk. *J. Anal. Appl. Pyrol.* **2012**, *97*, 130–136, <https://doi.org/10.1016/j.jaap.2012.05.012>.
- Fu, P.; Yi, W.; Bai, X.; Li, Z.; Hu, S.; Xiang, J. Effect of temperature on gas composition and char structural features of pyrolyzed agricultural residues. *Bioresour. Technol.* **2011**, *102*, 8211–8219, <https://doi.org/10.1016/j.biortech.2011.05.083>.
- Gao, N.B.; Li, A.M.; Quan, C.; Du, L.; Duan, Y. TG-FTIR and Py-GC/MS analysis on pyrolysis and combustion of pine sawdust. *J. Anal. Appl. Pyrol.* **2013**, *100*, 26–32, <https://doi.org/10.1016/j.jaap.2012.11.009>.
- Giuntoli, J.; Jong, W.D.; Arvelakis, S.; Spliethoff, H.; Verkooijen, A.H.M.. Quantitative and kinetic TG-FTIR study of biomass residue pyrolysis: dry distiller's grains with solubles (DDGS) and chicken manure. *J. Anal. Appl. Pyrolysis* **2009**, *85*, 301–312, <https://doi.org/10.1016/j.jaap.2008.12.007>.
- Granada, E.; Eguia, P.; Vilan, J.A.; Comesana, J.A.; Comesana, R. FTIR quantitative analysis technique for gases. Application in a biomass thermochemical process. *Renew Energy* **2012**, *41*, 416–421, <https://doi.org/10.1016/j.renene.2011.11.020>.
- Hammes, K.; Smernik, R.J.; Skjemstad, J.O.; Herzog, A.; Vogt, U.F.; Schmidt, M.W. Synthesis and characterisation of laboratory-charred grass straw (*Oryza sativa*) and chestnut wood (*Castanea sativa*) as reference materials for black carbon quantification. *Org. Geochem.* **2006**, *37*, 1629–1633,

- <https://doi.org/10.1016/j.orggeochem.2006.07.003>.
- Heikkinen, J.M.; Hordijk, J.C.; Jong, W.D.; Spliethoff, H. Thermogravimetry as a tool to classify waste components to be used for energy generation. *J. Anal. Appl. Pyrolysis* **2004**, *71*, 883–900, <https://doi.org/10.1016/j.jaap.2003.12.001>.
- Mimmo, T.; Panzacchi, P.; Baratieri, M.; Davies, C.A.; Tonon, G. ScienceDirect effect of pyrolysis temperature on miscanthus (*Miscanthus × giganteus*) biochar physical, chemical and functional properties. *Biomass Bioenergy* **2014**, *62*, 149–157, <https://doi.org/10.1016/j.biombioe.2014.01.004>.
- Yan, R.; Yang, H.P.; Chin, T.; Liang, D.T.; Chen, H.P.; Zheng, C.G. Influence of temperature on the distribution of gaseous products from pyrolyzing palm oil wastes. *Combust. Flame* **2005**, *142*, 24–32, <https://doi.org/10.1016/j.combustflame.2005.02.005>.
- Yang, H.; Yan, R.; Chen, H.; Lee, D.H.; Zheng, C. Characteristics of hemicellulose, cellulose and lignin pyrolysis. *Fuel* **2007**, 1781–1788, <https://doi.org/10.1016/j.fuel.2006.12.013>.

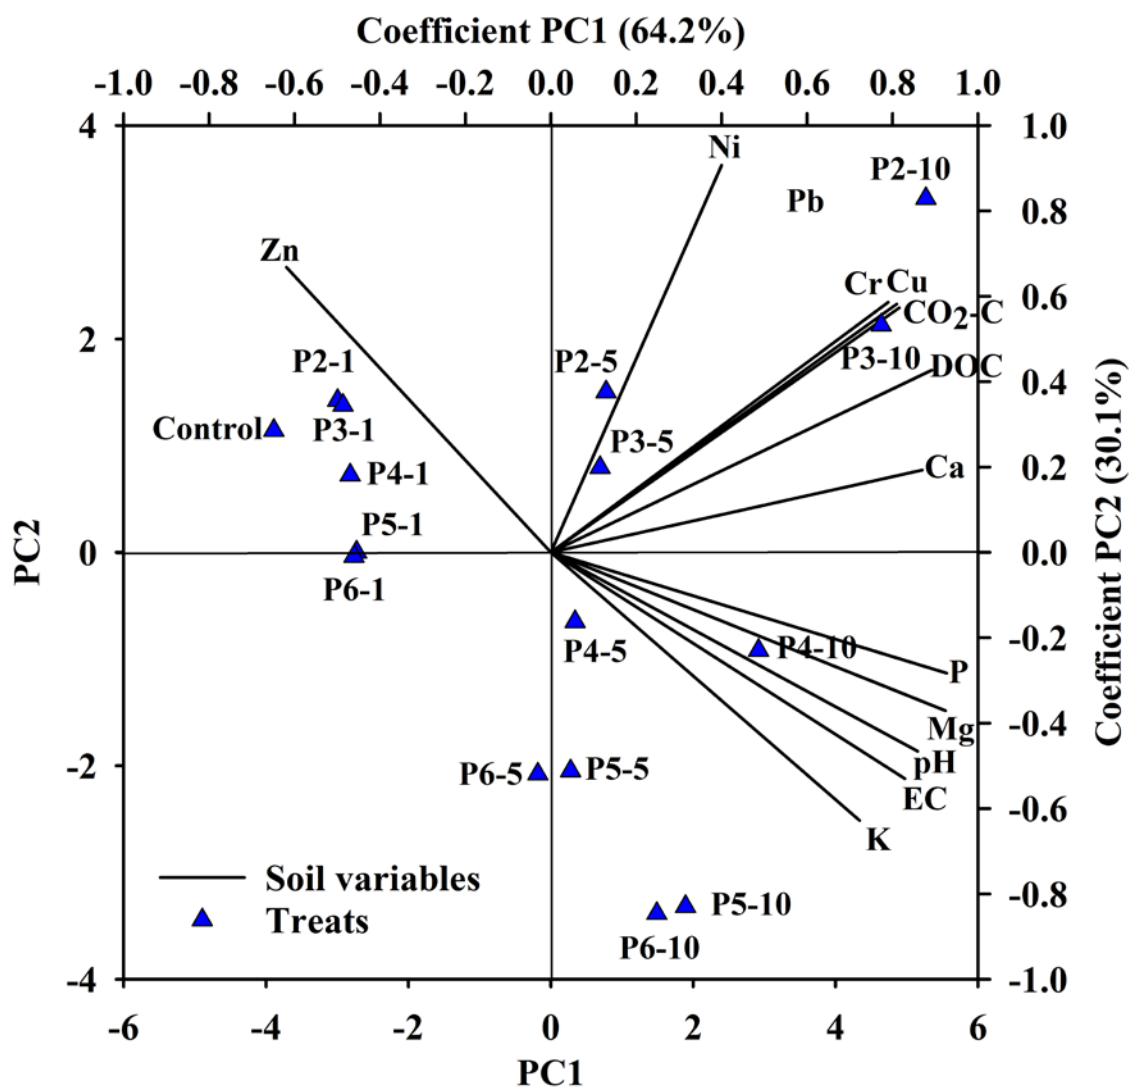

**Figure S2.** Principal component analysis, based on soil chemical characteristics and cumulative CO<sub>2</sub>-C after 56-d incubation period, in soil treated with 0% (control), 5.0% (-5), and 10% (-10) PLB (P2, P3, P4, P5, P6 = poultry litter pyrolyzed at 200, 300, 400, 500, and 600 °C).

**Table S1.** Characteristics of the five studied biochars.

| Characteristics <sup>1</sup>                                                                                   | Raw                                  | P2 <sup>2</sup>                      | P3                                   | P4                                   | P5                                   | P6                                   |
|----------------------------------------------------------------------------------------------------------------|--------------------------------------|--------------------------------------|--------------------------------------|--------------------------------------|--------------------------------------|--------------------------------------|
| pH <sup>3</sup>                                                                                                | 8.10                                 | 6.94                                 | 6.83                                 | 7.12                                 | 9.66                                 | 9.81                                 |
| EC (dS m <sup>-1</sup> )                                                                                       | 8.96 <sup>3</sup> /10.1 <sup>4</sup> | 9.18 <sup>3</sup> /9.23 <sup>4</sup> | 9.33 <sup>3</sup> /9.52 <sup>4</sup> | 8.50 <sup>3</sup> /10.5 <sup>4</sup> | 8.69 <sup>3</sup> /12.4 <sup>4</sup> | 8.71 <sup>3</sup> /12.5 <sup>4</sup> |
| Available N (g kg <sup>-1</sup> )                                                                              | -- <sup>5</sup>                      | 11.4                                 | 10.6                                 | 5.65                                 | 0.94                                 | 0.39                                 |
| CEC (cmol(+) kg <sup>-1</sup> )                                                                                | 30.0                                 | 37.5                                 | 33.2                                 | 21.9                                 | 31.5                                 | 29.3                                 |
| M3-P (g kg <sup>-1</sup> )                                                                                     | 6.43                                 | 7.95                                 | 6.32                                 | 6.46                                 | 8.86                                 | 6.38                                 |
| M3-K (g kg <sup>-1</sup> )                                                                                     | 20.4                                 | 27.9                                 | 24.3                                 | 25.4                                 | 42.9                                 | 35.1                                 |
| M3-Ca (g kg <sup>-1</sup> )                                                                                    | 8.01                                 | 8.40                                 | 6.96                                 | 7.48                                 | 10.1                                 | 8.29                                 |
| M3-Mg (g kg <sup>-1</sup> )                                                                                    | 4.58                                 | 5.45                                 | 4.52                                 | 4.42                                 | 5.76                                 | 4.19                                 |
| Total P (g kg <sup>-1</sup> )                                                                                  | -- <sup>5</sup>                      | 9.28                                 | 11.6                                 | 13.4                                 | 20.9                                 | 19.8                                 |
| Total K (g kg <sup>-1</sup> )                                                                                  | -- <sup>5</sup>                      | 24.0                                 | 28.8                                 | 33.4                                 | 49.4                                 | 47.9                                 |
| Total Ca (g kg <sup>-1</sup> )                                                                                 | -- <sup>5</sup>                      | 17.8                                 | 22.8                                 | 26.2                                 | 40.3                                 | 38.3                                 |
| Total Mg (g kg <sup>-1</sup> )                                                                                 | -- <sup>5</sup>                      | 6.14                                 | 7.45                                 | 8.73                                 | 13.8                                 | 13.0                                 |
| C%                                                                                                             | 33.7                                 | 36.4                                 | 39.1                                 | 41.0                                 | 46.4                                 | 46.3                                 |
| N%                                                                                                             | 2.4                                  | 3.17                                 | 3.19                                 | 3.53                                 | 3.55                                 | 3.39                                 |
| H%                                                                                                             | 5.48                                 | 5.42                                 | 5.11                                 | 4.89                                 | 2.74                                 | 2.65                                 |
| O%                                                                                                             | 42.0                                 | 41.5                                 | 39.1                                 | 34.6                                 | 17.4                                 | 17.1                                 |
| S%                                                                                                             | 1.08                                 | 1.10                                 | 1.08                                 | 1.18                                 | 1.84                                 | 1.82                                 |
| (O+N)/C atomic ratio                                                                                           | 1.01                                 | 0.93                                 | 0.82                                 | 0.71                                 | 0.35                                 | 0.34                                 |
| O/C atomic ratio                                                                                               | 0.83                                 | 0.76                                 | 0.67                                 | 0.56                                 | 0.25                                 | 0.25                                 |
| H/C atomic ratio                                                                                               | 1.95                                 | 1.79                                 | 1.57                                 | 1.43                                 | 0.71                                 | 0.69                                 |
| <b>C Type (%)</b>                                                                                              |                                      |                                      |                                      |                                      |                                      |                                      |
| <b>Distribution of C Chemical Shift (ppm) (Integrated Results of Solid-State <sup>13</sup>C NMR Spectra)</b>   | <b>Raw</b>                           | <b>P2</b>                            | <b>P4</b>                            | <b>P6</b>                            |                                      |                                      |
| Paraffinic C (0–50 ppm)                                                                                        | 12                                   | 14                                   | 20                                   | 25                                   |                                      |                                      |
| Substituted aliphatic C including alcohol, amines, carbohydrates, ethers, and methyl and acetal C (50–109 ppm) | 76                                   | 71                                   | 57                                   | 17                                   |                                      |                                      |
| Aromatic C (109–145 ppm)                                                                                       | 4.4                                  | 5.7                                  | 11                                   | 35                                   |                                      |                                      |
| Phenolic C (145–163 ppm)                                                                                       | 3.7                                  | 4.3                                  | 5.7                                  | 10                                   |                                      |                                      |
| Carboxyl C (163–190 ppm)                                                                                       | 3.5                                  | 5.1                                  | 4.8                                  | 4.9                                  |                                      |                                      |
| Carbonyl C (190–220 ppm)                                                                                       | 0.2                                  | 0.3                                  | 1.4                                  | 7.8                                  |                                      |                                      |
| Aliphatic C <sup>6</sup>                                                                                       | 88                                   | 85                                   | 77                                   | 42                                   |                                      |                                      |
| Polar C <sup>6</sup>                                                                                           | 84                                   | 80                                   | 69                                   | 40                                   |                                      |                                      |
| Aliphatic polar C <sup>6</sup>                                                                                 | 76                                   | 71                                   | 57                                   | 17                                   |                                      |                                      |

<sup>1</sup> P2, P3, P4, P5, P6 = poultry litter pyrolyzed at 200, 300, 400, 500, and 600 °C; <sup>2</sup> EC = electrical conductivity; CEC = cation exchange capacity; M3 = Mehlich-3 extractable; <sup>3</sup> The pH and EC of the biochar were measured using 1:5 solid; the solution ratio after shaking for 30 min in deionized water was calculated; <sup>4</sup> Biochar EC was measured after shaking the biochar–water mixtures (1:5 solid: solution ratio) for 24 h; <sup>5</sup> -- = No data; <sup>6</sup> Aliphatic C: total aliphatic C region (0–109 ppm); polar C: total polar carbon region (50–109 ppm and 145–220 ppm); aliphatic polar C: polar carbon in the aliphatic region (50–109 ppm). [Abstracted from Tsai and Chang [42]]

**Table S2.** The results of basic statistical description of soil parameters.

| Variable: Cumulative CO <sub>2</sub> -C (mg kg <sup>-1</sup> ) |                |                     |                    |         |
|----------------------------------------------------------------|----------------|---------------------|--------------------|---------|
| Moments                                                        |                |                     |                    |         |
| N                                                              | 48             | Sum weights         | 48                 |         |
| Mean                                                           | 4491           | Sum Observations    | 215546             |         |
| Standard deviation                                             | 4415           | Variance            | 19493709           |         |
| Skewness                                                       | 1.409          | Kurtosis            | 0.815              |         |
| Uncorrected SS                                                 | 1884122622     | Corrected SS        | 916204328          |         |
| Coefficient Variation                                          | 98.3           | Std Error Mean      | 637                |         |
| Basic Statical Measures                                        |                |                     |                    |         |
| Location                                                       |                | Variability         |                    |         |
| Mean                                                           | 4491           | Std Deviation       | 4415               |         |
| Median                                                         | 2248           | Variance            | 19493709           |         |
| Mode                                                           | 1801           | Range               | 14402              |         |
|                                                                |                | Interquartile Range | 5580               |         |
| Teats for Normality                                            |                |                     |                    |         |
| Test                                                           | — Statistics — |                     | — <i>p</i> Value — |         |
| Shapiro-Wilk                                                   | W              | 0.7465              | Pr < W             | <0.0001 |
| Kolmogorov-Smirnov                                             | D              | 0.2967              | Pr > D             | <0.0100 |
| Cramer-von Mises                                               | W-Sq           | 0.8465              | Pr > W-Sq          | <0.0050 |
| Anderson-Darling                                               | A-Sq           | 4.8138              | Pr > A-Sq          | <0.0050 |

| Variable: pH            |                |                     |                    |         |
|-------------------------|----------------|---------------------|--------------------|---------|
| Moments                 |                |                     |                    |         |
| N                       | 48             | Sum weights         | 48                 |         |
| Mean                    | 5.83           | Sum Observations    | 280                |         |
| Standard deviation      | 0.90           | Variance            | 0.80               |         |
| Skewness                | -0.31          | Kurtosis            | -1.66              |         |
| Uncorrected SS          | 1669           | Corrected SS        | 37.7               |         |
| Coefficient Variation   | 15.37          | Std Error Mean      | 0.13               |         |
| Basic Statical Measures |                |                     |                    |         |
| Location                |                | Variability         |                    |         |
| Mean                    | 5.83           | Std Deviation       | 0.90               |         |
| Median                  | 6.28           | Variance            | 0.80               |         |
| Mode                    | 4.90           | Range               | 2.55               |         |
|                         |                | Interquartile Range | 1.68               |         |
| Teats for Normality     |                |                     |                    |         |
| Test                    | — Statistics — |                     | — <i>p</i> Value — |         |
| Shapiro-Wilk            | W              | 0.8410              | Pr < W             | <0.0001 |
| Kolmogorov-Smirnov      | D              | 0.2393              | Pr > D             | <0.0100 |
| Cramer-von Mises        | W-Sq           | 0.5768              | Pr > W-Sq          | <0.0050 |
| Anderson-Darling        | A-Sq           | 3.2557              | Pr > A-Sq          | <0.0050 |

| Variable: Electrical conductivity (dS m <sup>-1</sup> ) |      |                  |     |  |
|---------------------------------------------------------|------|------------------|-----|--|
| Moments                                                 |      |                  |     |  |
| N                                                       | 48   | Sum weights      | 48  |  |
| Mean                                                    | 2.63 | Sum Observations | 126 |  |

|                                |                |                     |                    |         |
|--------------------------------|----------------|---------------------|--------------------|---------|
| Standard deviation             | 1.30           | Variance            | 1.70               |         |
| Skewness                       | 0.27           | Kurtosis            | -1.09              |         |
| Uncorrected SS                 | 411            | Corrected SS        | 79.8               |         |
| Coefficient Variation          | 49.6           | Std Error Mean      | 0.19               |         |
| <b>Basic Statical Measures</b> |                |                     |                    |         |
| Location                       |                | Variability         |                    |         |
| Mean                           | 2.63           | Std Deviation       | 1.30               |         |
| Median                         | 2.61           | Variance            | 1.70               |         |
| Mode                           | 1.33           | Range               | 4.11               |         |
|                                |                | Interquartile Range | 2.25               |         |
| <b>Teats for Normality</b>     |                |                     |                    |         |
| Test                           | — Statistics — |                     | — <i>p</i> Value — |         |
| Shapiro-Wilk                   | W              | 0.9064              | Pr < W             | 0.001   |
| Kolmogorov-Smirnov             | D              | 0.2134              | Pr > D             | <0.0100 |
| Cramer-von Mises               | W-Sq           | 0.2057              | Pr > W-Sq          | <0.0050 |
| Anderson-Darling               | A-Sq           | 1.5134              | Pr > A-Sq          | <0.0050 |

|                                                                |                |                     |                    |         |
|----------------------------------------------------------------|----------------|---------------------|--------------------|---------|
| <b>Variable: Dissolved organic carbon (mg kg<sup>-1</sup>)</b> |                |                     |                    |         |
| <b>Moments</b>                                                 |                |                     |                    |         |
| N                                                              | 48             | Sum weights         | 48                 |         |
| Mean                                                           | 285            | Sum Observations    | 13661              |         |
| Standard deviation                                             | 261            | Variance            | 68145              |         |
| Skewness                                                       | 1.50           | Kurtosis            | 1.15               |         |
| Uncorrected SS                                                 | 7090803        | Corrected SS        | 3202825            |         |
| Coefficient Variation                                          | 92             | Std Error Mean      | 38                 |         |
| <b>Basic Statical Measures</b>                                 |                |                     |                    |         |
| Location                                                       |                | Variability         |                    |         |
| Mean                                                           | 285            | Std Deviation       | 261                |         |
| Median                                                         | 181            | Variance            | 68145              |         |
| Mode                                                           | 101            | Range               | 892                |         |
|                                                                |                | Interquartile Range | 240                |         |
| <b>Teats for Normality</b>                                     |                |                     |                    |         |
| Test                                                           | — Statistics — |                     | — <i>p</i> Value — |         |
| Shapiro-Wilk                                                   | W              | 0.7609              | Pr < W             | <0.0001 |
| Kolmogorov-Smirnov                                             | D              | 0.2025              | Pr > D             | <0.0100 |
| Cramer-von Mises                                               | W-Sq           | 0.7262              | Pr > W-Sq          | <0.0050 |
| Anderson-Darling                                               | A-Sq           | 4.2772              | Pr > A-Sq          | <0.0050 |

|                                         |       |                  |       |  |
|-----------------------------------------|-------|------------------|-------|--|
| <b>Variable: P (mg kg<sup>-1</sup>)</b> |       |                  |       |  |
| <b>Moments</b>                          |       |                  |       |  |
| N                                       | 48    | Sum weights      | 48    |  |
| Mean                                    | 17.8  | Sum Observations | 856   |  |
| Standard deviation                      | 14.8  | Variance         | 220   |  |
| Skewness                                | 0.35  | Kurtosis         | -1.45 |  |
| Uncorrected SS                          | 25597 | Corrected SS     | 10317 |  |
| Coefficient Variation                   | 83.0  | Std Error Mean   | 2.14  |  |
| <b>Basic Statical Measures</b>          |       |                  |       |  |



|                            |                |                     |                    |         |
|----------------------------|----------------|---------------------|--------------------|---------|
| Location                   |                | Variability         |                    |         |
| Mean                       | 17.8           | Std Deviation       | 14.8               |         |
| Median                     | 15.5           | Variance            | 220                |         |
| Mode                       | 2.50           | Range               | 38.8               |         |
|                            |                | Interquartile Range | 31.0               |         |
| <b>Teats for Normality</b> |                |                     |                    |         |
| Test                       | — Statistics — |                     | — <i>p</i> Value — |         |
| Shapiro-Wilk               | W              | 0.8425              | Pr < W             | <0.0001 |
| Kolmogorov-Smirnov         | D              | 0.2184              | Pr > D             | <0.0100 |
| Cramer-von Mises           | W-Sq           | 0.3637              | Pr > W-Sq          | <0.0050 |
| Anderson-Darling           | A-Sq           | 2.6209              | Pr > A-Sq          | <0.0050 |

|                                         |                |                     |                    |         |
|-----------------------------------------|----------------|---------------------|--------------------|---------|
| <b>Variable: K (mg kg<sup>-1</sup>)</b> |                |                     |                    |         |
| <b>Moments</b>                          |                |                     |                    |         |
| N                                       | 48             | Sum weights         | 48                 |         |
| Mean                                    | 793            | Sum Observations    | 38065              |         |
| Standard deviation                      | 709            | Variance            | 502683             |         |
| Skewness                                | 0.81           | Kurtosis            | -0.34              |         |
| Uncorrected SS                          | 53811634       | Corrected SS        | 23626089           |         |
| Coefficient Variation                   | 89.4           | Std Error Mean      | 102                |         |
| <b>Basic Statical Measures</b>          |                |                     |                    |         |
| Location                                |                | Variability         |                    |         |
| Mean                                    | 793            | Std Deviation       | 709                |         |
| Median                                  | 616            | Variance            | 502683             |         |
| Mode                                    | 174            | Range               | 2223               |         |
|                                         |                | Interquartile Range | 995                |         |
| <b>Teats for Normality</b>              |                |                     |                    |         |
| Test                                    | — Statistics — |                     | — <i>p</i> Value — |         |
| Shapiro-Wilk                            | W              | 0.8650              | Pr < W             | <0.0001 |
| Kolmogorov-Smirnov                      | D              | 0.1817              | Pr > D             | <0.0100 |
| Cramer-von Mises                        | W-Sq           | 0.2724              | Pr > W-Sq          | <0.0050 |
| Anderson-Darling                        | A-Sq           | 2.0333              | Pr > A-Sq          | <0.0050 |

|                                          |          |                     |        |  |
|------------------------------------------|----------|---------------------|--------|--|
| <b>Variable: Ca (mg kg<sup>-1</sup>)</b> |          |                     |        |  |
| <b>Moments</b>                           |          |                     |        |  |
| N                                        | 48       | Sum weights         | 48     |  |
| Mean                                     | 477      | Sum Observations    | 22907  |  |
| Standard deviation                       | 112      | Variance            | 12443  |  |
| Skewness                                 | 0.02     | Kurtosis            | -0.87  |  |
| Uncorrected SS                           | 11516723 | Corrected SS        | 584834 |  |
| Coefficient Variation                    | 23.4     | Std Error Mean      | 16.1   |  |
| <b>Basic Statical Measures</b>           |          |                     |        |  |
| Location                                 |          | Variability         |        |  |
| Mean                                     | 477      | Std Deviation       | 112    |  |
| Median                                   | 459      | Variance            | 12443  |  |
| Mode                                     | 267      | Range               | 421    |  |
|                                          |          | Interquartile Range | 183    |  |

| Teats for Normality |                |        |                    |        |
|---------------------|----------------|--------|--------------------|--------|
| Test                | — Statistics — |        | — <i>p</i> Value — |        |
| Shapiro-Wilk        | W              | 0.9541 | Pr < W             | 0.0586 |
| Kolmogorov-Smirnov  | D              | 0.1291 | Pr > D             | 0.0443 |
| Cramer-von Mises    | W-Sq           | 0.1398 | Pr > W-Sq          | 0.0326 |
| Anderson-Darling    | A-Sq           | 0.8209 | Pr > A-Sq          | 0.0329 |

| Variable: Mg (mg kg <sup>-1</sup> ) |                |                     |                    |         |
|-------------------------------------|----------------|---------------------|--------------------|---------|
| Moments                             |                |                     |                    |         |
| N                                   | 48             | Sum weights         | 48                 |         |
| Mean                                | 215            | Sum Observations    | 10301              |         |
| Standard deviation                  | 97.6           | Variance            | 9531               |         |
| Skewness                            | -0.13          | Kurtosis            | -1.57              |         |
| Uncorrected SS                      | 2658611        | Corrected SS        | 447973             |         |
| Coefficient Variation               | 45.5           | Std Error Mean      | 14.1               |         |
| Basic Statical Measures             |                |                     |                    |         |
| Location                            |                | Variability         |                    |         |
| Mean                                | 215            | Std Deviation       | 97.6               |         |
| Median                              | 227            | Variance            | 9531               |         |
| Mode                                | 105            | Range               | 283                |         |
|                                     |                | Interquartile Range | 209                |         |
| Teats for Normality                 |                |                     |                    |         |
| Test                                | — Statistics — |                     | — <i>p</i> Value — |         |
| Shapiro-Wilk                        | W              | 0.8654              | Pr < W             | <0.0001 |
| Kolmogorov-Smirnov                  | D              | 0.2284              | Pr > D             | <0.0100 |
| Cramer-von Mises                    | W-Sq           | 0.3722              | Pr > W-Sq          | <0.0050 |
| Anderson-Darling                    | A-Sq           | 2.5017              | Pr > A-Sq          | <0.0050 |

| Variable: Cr (mg kg <sup>-1</sup> ) |                |                     |                    |         |
|-------------------------------------|----------------|---------------------|--------------------|---------|
| Moments                             |                |                     |                    |         |
| N                                   | 48             | Sum weights         | 48                 |         |
| Mean                                | 0.206          | Sum Observations    | 9.89               |         |
| Standard deviation                  | 0.275          | Variance            | 0.076              |         |
| Skewness                            | 2.01           | Kurtosis            | 2.94               |         |
| Uncorrected SS                      | 5.60           | Corrected SS        | 3.56               |         |
| Coefficient Variation               | 134            | Std Error Mean      | 0.040              |         |
| Basic Statical Measures             |                |                     |                    |         |
| Location                            |                | Variability         |                    |         |
| Mean                                | 0.206          | Std Deviation       | 0.275              |         |
| Median                              | 0.070          | Variance            | 0.076              |         |
| Mode                                | 0.060          | Range               | 1.01               |         |
|                                     |                | Interquartile Range | 0.215              |         |
| Teats for Normality                 |                |                     |                    |         |
| Test                                | — Statistics — |                     | — <i>p</i> Value — |         |
| Shapiro-Wilk                        | W              | 0.6385              | Pr < W             | <0.0001 |
| Kolmogorov-Smirnov                  | D              | 0.3015              | Pr > D             | <0.0100 |
| Cramer-von Mises                    | W-Sq           | 1.3027              | Pr > W-Sq          | <0.0050 |

|                  |      |        |           |         |
|------------------|------|--------|-----------|---------|
| Anderson-Darling | A-Sq | 7.1188 | Pr > A-Sq | <0.0050 |
|------------------|------|--------|-----------|---------|

| Variable: Cu (mg kg <sup>-1</sup> ) |                |                     |                    |         |
|-------------------------------------|----------------|---------------------|--------------------|---------|
| Moments                             |                |                     |                    |         |
| N                                   | 48             | Sum weights         | 48                 |         |
| Mean                                | 2.25           | Sum Observations    | 108                |         |
| Standard deviation                  | 2.59           | Variance            | 6.73               |         |
| Skewness                            | 1.62           | Kurtosis            | 1.50               |         |
| Uncorrected SS                      | 559            | Corrected SS        | 316                |         |
| Coefficient Variation               | 115            | Std Error Mean      | 0.37               |         |
| Basic Statical Measures             |                |                     |                    |         |
| Location                            |                | Variability         |                    |         |
| Mean                                | 2.25           | Std Deviation       | 2.59               |         |
| Median                              | 0.86           | Variance            | 6.73               |         |
| Mode                                | 0.39           | Range               | 9.03               |         |
|                                     |                | Interquartile Range | 2.84               |         |
| Teats for Normality                 |                |                     |                    |         |
| Test                                | — Statistics — |                     | — <i>p</i> Value — |         |
| Shapiro-Wilk                        | W              | 0.7120              | Pr < W             | <0.0001 |
| Kolmogorov-Smirnov                  | D              | 0.3003              | Pr > D             | <0.0100 |
| Cramer-von Mises                    | W-Sq           | 0.9809              | Pr > W-Sq          | <0.0050 |
| Anderson-Darling                    | A-Sq           | 5.5404              | Pr > A-Sq          | <0.0050 |

| Variable: Ni (mg kg <sup>-1</sup> ) |                |                     |                    |        |
|-------------------------------------|----------------|---------------------|--------------------|--------|
| Moments                             |                |                     |                    |        |
| N                                   | 48             | Sum weights         | 48                 |        |
| Mean                                | 2.09           | Sum Observations    | 100                |        |
| Standard deviation                  | 1.42           | Variance            | 2.01               |        |
| Skewness                            | 0.81           | Kurtosis            | 0.16               |        |
| Uncorrected SS                      | 304            | Corrected SS        | 94.4               |        |
| Coefficient Variation               | 67.8           | Std Error Mean      | 0.20               |        |
| Basic Statical Measures             |                |                     |                    |        |
| Location                            |                | Variability         |                    |        |
| Mean                                | 2.09           | Std Deviation       | 1.42               |        |
| Median                              | 2.00           | Variance            | 2.01               |        |
| Mode                                | 0.49           | Range               | 5.31               |        |
|                                     |                | Interquartile Range | 1.96               |        |
| Teats for Normality                 |                |                     |                    |        |
| Test                                | — Statistics — |                     | — <i>p</i> Value — |        |
| Shapiro-Wilk                        | W              | 0.9125              | Pr < W             | 0.0016 |
| Kolmogorov-Smirnov                  | D              | 0.1117              | Pr > D             | 0.1372 |
| Cramer-von Mises                    | W-Sq           | 0.1365              | Pr > W-Sq          | 0.0365 |
| Anderson-Darling                    | A-Sq           | 1.1276              | Pr > A-Sq          | 0.0055 |

| Variable: Zn (mg kg <sup>-1</sup> ) |    |             |    |  |
|-------------------------------------|----|-------------|----|--|
| Moments                             |    |             |    |  |
| N                                   | 48 | Sum weights | 48 |  |

|                                |                |                     |               |        |
|--------------------------------|----------------|---------------------|---------------|--------|
| Mean                           | 2.09           | Sum Observations    | 100           |        |
| Standard deviation             | 1.42           | Variance            | 2.01          |        |
| Skewness                       | 0.81           | Kurtosis            | 0.16          |        |
| Uncorrected SS                 | 304            | Corrected SS        | 94.4          |        |
| Coefficient Variation          | 67.8           | Std Error Mean      | 0.20          |        |
| <b>Basic Statical Measures</b> |                |                     |               |        |
| Location                       |                | Variability         |               |        |
| Mean                           | 2.09           | Std Deviation       | 1.42          |        |
| Median                         | 2.00           | Variance            | 2.01          |        |
| Mode                           | 0.49           | Range               | 5.31          |        |
|                                |                | Interquartile Range | 1.96          |        |
| <b>Teats for Normality</b>     |                |                     |               |        |
| Test                           | — Statistics — |                     | — $p$ Value — |        |
| Shapiro-Wilk                   | W              | 0.9125              | Pr < W        | 0.0016 |
| Kolmogorov-Smirnov             | D              | 0.1117              | Pr > D        | 0.1372 |
| Cramer-von Mises               | W-Sq           | 0.1365              | Pr > W-Sq     | 0.0365 |
| Anderson-Darling               | A-Sq           | 1.1276              | Pr > A-Sq     | 0.0055 |

**Table S3.** Standardized canonical coefficients (SCC) and correlation coefficients (*r*) between the first two canonical discriminant functions (Can) and variables.

| Variables               | Can1 (82.5%) |           | Can2 (11.4%) |          |
|-------------------------|--------------|-----------|--------------|----------|
|                         | SCC          | <i>r</i>  | SCC          | <i>r</i> |
| pH                      | 4.856        | 0.880***  | 12.60        | 0.412*   |
| Dissolve organic carbon | -10.00       | 0.315     | 12.85        | 0.865*** |
| P                       | -1.499       | 0.856***  | 6.083        | 0.451*   |
| K                       | 65.44        | 0.996***  | -25.48       | 0.052    |
| Ca                      | -1.660       | 0.377*    | 7.810        | 0.866*** |
| Cr                      | 1.656        | 0.145     | 0.454        | 0.866*** |
| Cu                      | 3.632        | 0.150     | -0.177       | 0.898*** |
| Zn                      | -3.396       | -0.800*** | -2.570       | -0.202   |

<sup>1</sup> \*  $p < 0.01$ ; \*\*  $p < 0.001$ ; \*\*\*  $p < 0.0001$ .

**Table S4.** Significant test of water extraction solution pH, electrical conductivity, and dissolve organic carbon after 56 days incubation.

| Treats <sup>1</sup> | pH          |                         | Electrical conductivity       |                         | Dissolve organic carbon        |                         |
|---------------------|-------------|-------------------------|-------------------------------|-------------------------|--------------------------------|-------------------------|
|                     | Mean±SD     | Change (%) <sup>2</sup> | Mean±SD (dS m <sup>-1</sup> ) | Change (%) <sup>2</sup> | Mean±SD (mg kg <sup>-1</sup> ) | Change (%) <sup>2</sup> |
| Control             | 4.4±0.07 k  |                         | 0.8±0.02 l                    |                         | 68.3±2.3 j                     |                         |
| P2-1                | 4.6±0.07 j  | 3                       | 1.2±0.01 k                    | 54                      | 105±1.9 i                      | 54                      |
| P2-5                | 5.5±0.06 g  | 24                      | 2.5±0.03 h                    | 211                     | 360±17 d                       | 427                     |
| P2-10               | 6.5±0.02 d  | 47                      | 3.5±0.01 d                    | 328                     | 932±28 a                       | 1264                    |
| P3-1                | 4.9±0.02 hi | 10                      | 1.2±0.02 k                    | 54                      | 101 ±0.2 i                     | 48                      |
| P3-5                | 6.3±0.01 f  | 41                      | 2.5±0.03 h                    | 211                     | 324±15 e                       | 375                     |
| P3-10               | 6.6±0.03 c  | 49                      | 3.7±0.03 c                    | 354                     | 826±17 b                       | 1109                    |
| P4-1                | 4.8±0.01 i  | 9                       | 1.3±0.02 jk                   | 58                      | 99.3±1.6 i                     | 45                      |
| P4-5                | 6.3±0.03 f  | 41                      | 2.7±0.08 g                    | 240                     | 272±2.9 f                      | 299                     |
| P4-10               | 6.7±0.03 b  | 51                      | 4.0±0.03 b                    | 393                     | 554±41 c                       | 710                     |
| P5-1                | 4.9±0.02 hi | 10                      | 1.3±0.00 i                    | 65                      | 87.0±1.0 ij                    | 27                      |
| P5-5                | 6.5±0.04 e  | 45                      | 3.2±0.05 e                    | 291                     | 168±4.1 g                      | 146                     |
| P5-10               | 6.9±0.04 a  | 54                      | 4.9±0.00 a                    | 507                     | 250±7.5 f                      | 266                     |
| P6-1                | 4.9±0.02 h  | 11                      | 1.3±0.01 ij                   | 64                      | 82.3±1.0 ij                    | 20                      |
| P6-5                | 6.5±0.01 d  | 47                      | 3.0±0.03 f                    | 276                     | 134 ±0.9 h                     | 97                      |
| P6-10               | 6.9±0.02 a  | 55                      | 4.9±0.00 a                    | 502                     | 190 ±1.4g                      | 178                     |

<sup>1</sup>: P2, P3, P4, P5, P6 = poultry litter pyrolyzed at 200, 300, 400, 500, and 600°C; -1 = 1% biochar addition; -5 = 5% biochar addition; -10 = 10% biochar addition; <sup>2</sup>: Percentage expressed as the difference of value between biochar amended treatments and un-amended control treatment; 0% indicates as No change in amount of those properties due to biochar addition; <sup>3</sup>: Means (n =3) compared within a column followed by a different lowercase letter are significantly different at p < 0.05 using a one-way ANOVA.

**Table S5.** Significant test of water extractable P, K, Ca, and Mg after 56 days incubation.

| Treats <sup>1</sup> | P                                 |                            | K                                 |                            | Ca                                |                            | Mg                                |                            |
|---------------------|-----------------------------------|----------------------------|-----------------------------------|----------------------------|-----------------------------------|----------------------------|-----------------------------------|----------------------------|
|                     | Mean±SD<br>(mg kg <sup>-1</sup> ) | Change<br>(%) <sup>2</sup> |
| Control             | 1.80 ±0.20 h <sup>3</sup>         |                            | 19.1 ±2.00 l                      |                            | 264 ±4.54 j                       |                            | 66.3 ±1.80 i                      |                            |
| P2-1                | 2.28 ±0.19 h                      | 27                         | 93.5 ±0.07 k                      | 388                        | 387 ±5.63 gh                      | 46                         | 104 ±1.83 h                       | 57                         |
| P2-5                | 12.7 ±0.64 g                      | 608                        | 498 ±16.1 h                       | 2502                       | 625 ±10.4 b                       | 136                        | 222 ±3.03 g                       | 235                        |
| P2-10               | 35.7 ±0.30 b                      | 1883                       | 1055 ±14.7 d                      | 5410                       | 674 ±5.70 a                       | 155                        | 318 ±1.15 c                       | 381                        |
| P3-1                | 2.30 ±0.20 h                      | 30                         | 100 ±3.26 k                       | 424                        | 384 ±6.88 ghi                     | 45                         | 104 ±2.05 h                       | 57                         |
| P3-5                | 14.5 ±0.24 f                      | 706                        | 555 ±12.2 g                       | 2798                       | 569 ±6.82 d                       | 115                        | 218 ±3.81 g                       | 229                        |
| P3-10               | 39.8 ±0.26 a                      | 2107                       | 1224 ±7.71 c                      | 6297                       | 604 ±5.42 c                       | 128                        | 318 ±1.08 c                       | 379                        |
| P4-1                | 2.36 ±0.14 h                      | 31                         | 122 ±2.82 j                       | 537                        | 389 ±13.0 g                       | 47                         | 107 ±2.60 h                       | 61                         |
| P4-5                | 17.0 ±0.90 e                      | 843                        | 689 ±21.1 f                       | 3499                       | 561 ±21.5 d                       | 112                        | 237 ±8.74 f                       | 258                        |
| P4-10               | 39.6 ±1.18 a                      | 2098                       | 1500 ±18.1 b                      | 7739                       | 556 ±5.11 d                       | 110                        | 335 ±9.54 a                       | 406                        |
| P5-1                | 2.80 ±0.19 h                      | 56                         | 175 ±3.73 i                       | 815                        | 371 ±2.60 hi                      | 40                         | 111 ±0.99 h                       | 67                         |
| P5-5                | 24.1 ±1.35 d                      | 1236                       | 1018 ±8.20 e                      | 5218                       | 511 ±16.4 e                       | 93                         | 267 ±7.00 d                       | 303                        |
| P5-10               | 39.5 ±0.76 a                      | 2092                       | 2231 ±8.56 a                      | 11556                      | 455 ±11.1 f                       | 72                         | 342 ±4.23 a                       | 416                        |
| P6-1                | 2.54 ±0.23 h                      | 41                         | 175 ±3.23 i                       | 814                        | 368 ±4.49 i                       | 39                         | 109 ±0.93 h                       | 65                         |
| P6-5                | 17.4 ±0.65 e                      | 865                        | 1023 ±13.9 e                      | 5242                       | 462 ±5.89 f                       | 75                         | 247 ±2.53 e                       | 273                        |
| P6-10               | 31.1 ±0.56 c                      | 1627                       | 2211 ±20.7 a                      | 11453                      | 456 ±2.88 f                       | 73                         | 326 ±2.57 b                       | 392                        |

<sup>1</sup>: P2, P3, P4, P5, P6 = poultry litter pyrolyzed at 200, 300, 400, 500, and 600°C; -1 = 1% biochar addition; -5 = 5% biochar addition; -10 = 10% biochar addition; <sup>2</sup>: Percentage expressed as the difference of value between biochar amended treatments and un-amended control treatment; 0% indicates as No change in amount of those properties due to biochar addition; <sup>3</sup>: Means (n =3) compared within a column followed by a different lowercase letter are significantly different at p < 0.05 using a one-way ANOVA.

**Table S6.** Significant test of water extractable Cr, Cu, Ni, and Zn after 56 days incubation.

| Treats <sup>1</sup> | Cr                                   |     |                            | Cu                                 |     |                            | Ni                                 |   |                            | Zn                                 |    |                            |
|---------------------|--------------------------------------|-----|----------------------------|------------------------------------|-----|----------------------------|------------------------------------|---|----------------------------|------------------------------------|----|----------------------------|
|                     | Mean±SD<br>( $\mu\text{g kg}^{-1}$ ) |     | Change<br>(%) <sup>2</sup> | Mean±SD<br>( $\text{mg kg}^{-1}$ ) |     | Change<br>(%) <sup>2</sup> | Mean±SD<br>( $\text{mg kg}^{-1}$ ) |   | Change<br>(%) <sup>2</sup> | Mean±SD<br>( $\text{mg kg}^{-1}$ ) |    | Change<br>(%) <sup>2</sup> |
| Control             | 34.7 ±0.30                           | h   |                            | 0.37 ±0.02                         | i   |                            | 2.19 ±0.07                         | f |                            | 3.01 ±0.13                         | b  |                            |
| P2-1                | 67.7 ±1.16                           | fg  | 95                         | 0.88 ±0.02                         | fg  | 139                        | 2.64 ±0.11                         | e | 21                         | 3.14 ±0.15                         | ab | 4                          |
| P2-5                | 310 ±21.0                            | c   | 795                        | 4.02 ±0.23                         | c   | 993                        | 3.23 ±0.03                         | c | 48                         | 1.52 ±0.16                         | d  | -50                        |
| P2-10               | 986 ±46.3                            | a   | 2745                       | 8.90 ±0.42                         | a   | 2316                       | 5.41 ±0.24                         | a | 147                        | 1.11 ±0.05                         | fg | -63                        |
| P3-1                | 65.7 ±1.49                           | fg  | 89                         | 0.84 ±0.02                         | fgh | 127                        | 2.69 ±0.11                         | e | 23                         | 3.24 ±0.15                         | a  | 8                          |
| P3-5                | 247 ±14.1                            | d   | 613                        | 3.40 ±0.19                         | d   | 822                        | 2.86 ±0.01                         | d | 31                         | 1.35 ±0.04                         | e  | -55                        |
| P3-10               | 774 ±12.2                            | b   | 2132                       | 7.67 ±0.13                         | b   | 1983                       | 4.48 ±0.09                         | b | 105                        | 1.00 ±0.06                         | g  | -67                        |
| P4-1                | 53.0 ±2.81                           | fgh | 53                         | 0.64 ±0.04                         | ghi | 73                         | 2.02 ±0.07                         | g | -8                         | 2.20 ±0.08                         | c  | -27                        |
| P4-5                | 132 ±2.98                            | e   | 281                        | 1.85 ±0.05                         | e   | 402                        | 1.47 ±0.07                         | h | -33                        | 0.61 ±0.10                         | h  | -80                        |
| P4-10               | 291 ±31.3                            | c   | 739                        | 3.47 ±0.24                         | d   | 842                        | 1.99 ±0.14                         | g | -9                         | 0.37 ±0.02                         | i  | -88                        |
| P5-1                | 45.3 ±2.62                           | gh  | 31                         | 0.45 ±0.01                         | i   | 23                         | 1.32 ±0.05                         | i | -40                        | 1.18 ±0.07                         | f  | -61                        |
| P5-5                | 60.7 ±1.72                           | fgh | 75                         | 0.76 ±0.02                         | gh  | 105                        | 0.53 ±0.02                         | j | -76                        | 0.12 ±0.00                         | j  | -96                        |
| P5-10               | 80.0 ±4.30                           | f   | 131                        | 1.04 ±0.04                         | f   | 183                        | 0.50 ±0.01                         | j | -77                        | 0.08 ±0.03                         | j  | -97                        |
| P6-1                | 41.0 ±1.32                           | gh  | 18                         | 0.39 ±0.01                         | i   | 6                          | 1.28 ±0.07                         | i | -42                        | 1.18 ±0.13                         | f  | -61                        |
| P6-5                | 54.7 ±0.90                           | fgh | 58                         | 0.58 ±0.00                         | hi  | 57                         | 0.48 ±0.01                         | j | -78                        | 0.14 ±0.01                         | j  | -95                        |
| P6-10               | 62.0 ±1.09                           | fgh | 79                         | 0.73 ±0.02                         | gh  | 99                         | 0.39 ±0.04                         | j | -82                        | 0.06 ±0.02                         | j  | -98                        |

<sup>1</sup>: P2, P3, P4, P5, P6 = poultry litter pyrolyzed at 200, 300, 400, 500, and 600°C; -1 = 1% biochar addition; -5 = 5% biochar addition; -10 = 10% biochar addition; <sup>2</sup>: Percentage expressed as the difference of value between biochar amended treatments and un-amended control treatment; 0% indicates as No change in amount of those properties due to biochar addition; <sup>3</sup>: Means (n =3) compared within a column followed by a different lowercase letter are significantly different at p < 0.05 using a one-way ANOVA.
